# Supplementary material for: A facile and robust approach to prepare fluorinated polymer dielectrics for probing the intrinsic transport behavior of organic semiconductors
Source: Royal Society of Chemistry journal article supplement (doi:10.1039/d0ma00175a), 2020-01-01
Supplement: d0ma00175a1.pdf [file d0ma00175a1.pdf]

## Supplementary Information

# A Facile and Robust Approach to Prepare Fluorinated Polymer Dielectric for Probing Intrinsic Transport Behavior of Organic Semiconductors

Jenner H. L. Ngai,<sup>a</sup> Cyril Chak Ming Chan,<sup>a</sup> Carr Hoi Yi Ho,<sup>a</sup> Johnny Ka Wai Ho,<sup>a</sup> Sin Hang Cheung,<sup>a</sup> Hang Yin,<sup>a</sup> Shu Kong So<sup>a\*</sup>

a. Department of Physics and Institute of Advanced Materials, Hong Kong Baptist University, Kowloon Tong, Hong Kong

## Contents

|                                                                                                                                                                                                             |   |
|-------------------------------------------------------------------------------------------------------------------------------------------------------------------------------------------------------------|---|
| <b>Figure S1.</b> Chemical structures polyvinylidene difluoride ( <b>PVDF</b> ) 2,9-bis(3-(dimethylamino)propyl)anthra[2,1,9-def:6,5,10-d'e'f']diisoquinoline-1,3,8,10(2H,9H)-tetraone ( <b>PDIN</b> )..... | 2 |
| <b>Figure S2.</b> The dependence of capacitance values on frequency of <b>PVDF</b> and <b>PPFS</b> . ....                                                                                                   | 2 |
| <b>Figure S3.</b> DSC spectrum of <b>PPFS</b> synthesized in glovebox.....                                                                                                                                  | 3 |
| <b>Figure S4.</b> DSC spectrum of <b>PPFS</b> synthesized in ambient.....                                                                                                                                   | 4 |
| <b>Figure S5.</b> AFM images of (a) Pristine <b>PPFS</b> polymer thin film; (b) Chloroform; (c) Chlorobenzene and (d) Toluene treated <b>PPFS</b> polymer thin film. ....                                   | 5 |
| <b>Figure S6.</b> Transfer and output characteristics of <b>ITIC-Th</b> , <b>ITIC</b> , <b>N2200</b> and <b>PC<sub>71</sub>BM</b> without the use of <b>PDIN</b> as the electron injection layer.....       | 6 |
| <b>Figure S7.</b> (a) Transfer and (b) output characteristic of <b>PC<sub>71</sub>BM</b> n-type transistor employing <b>PVDF</b> as gate dielectric. ....                                                   | 7 |
| <b>Figure S8.</b> Water contact angle of CYTOP <sup>TM</sup> -treated SiO <sub>2</sub> surface. ....                                                                                                        | 8 |
| <b>Table S1.</b> Electronic properties of <b>ITIC-Th</b> , <b>ITIC</b> , <b>N2200</b> and <b>PC<sub>71</sub>BM</b> without the use of <b>PDIN</b> as the electron injection layer.....                      | 6 |

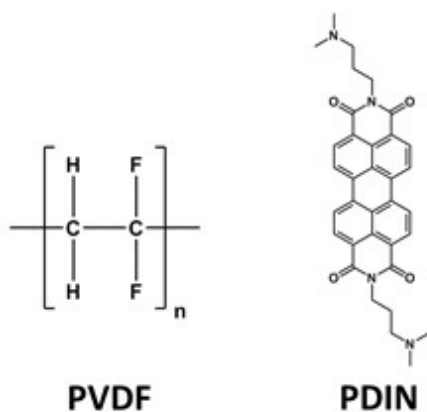

**Figure S1.** Chemical structures polyvinylidene difluoride (**PVDF**) 2,9-bis(3-(dimethylamino)propyl)anthra[2,1,9-def:6,5,10-d'e'f]diisoquinoline-1,3,8,10(2H,9H)-tetraone (**PDIN**).

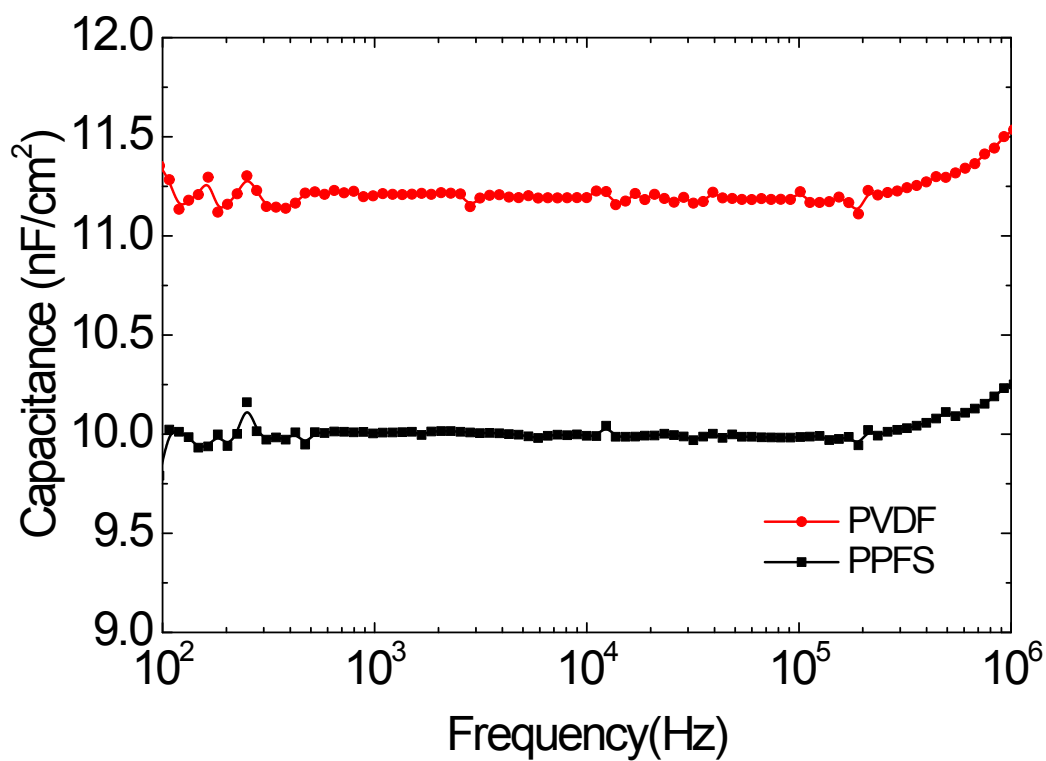

**Figure S2.** The dependence of capacitance values on frequency of **PVDF** and **PPFS**.

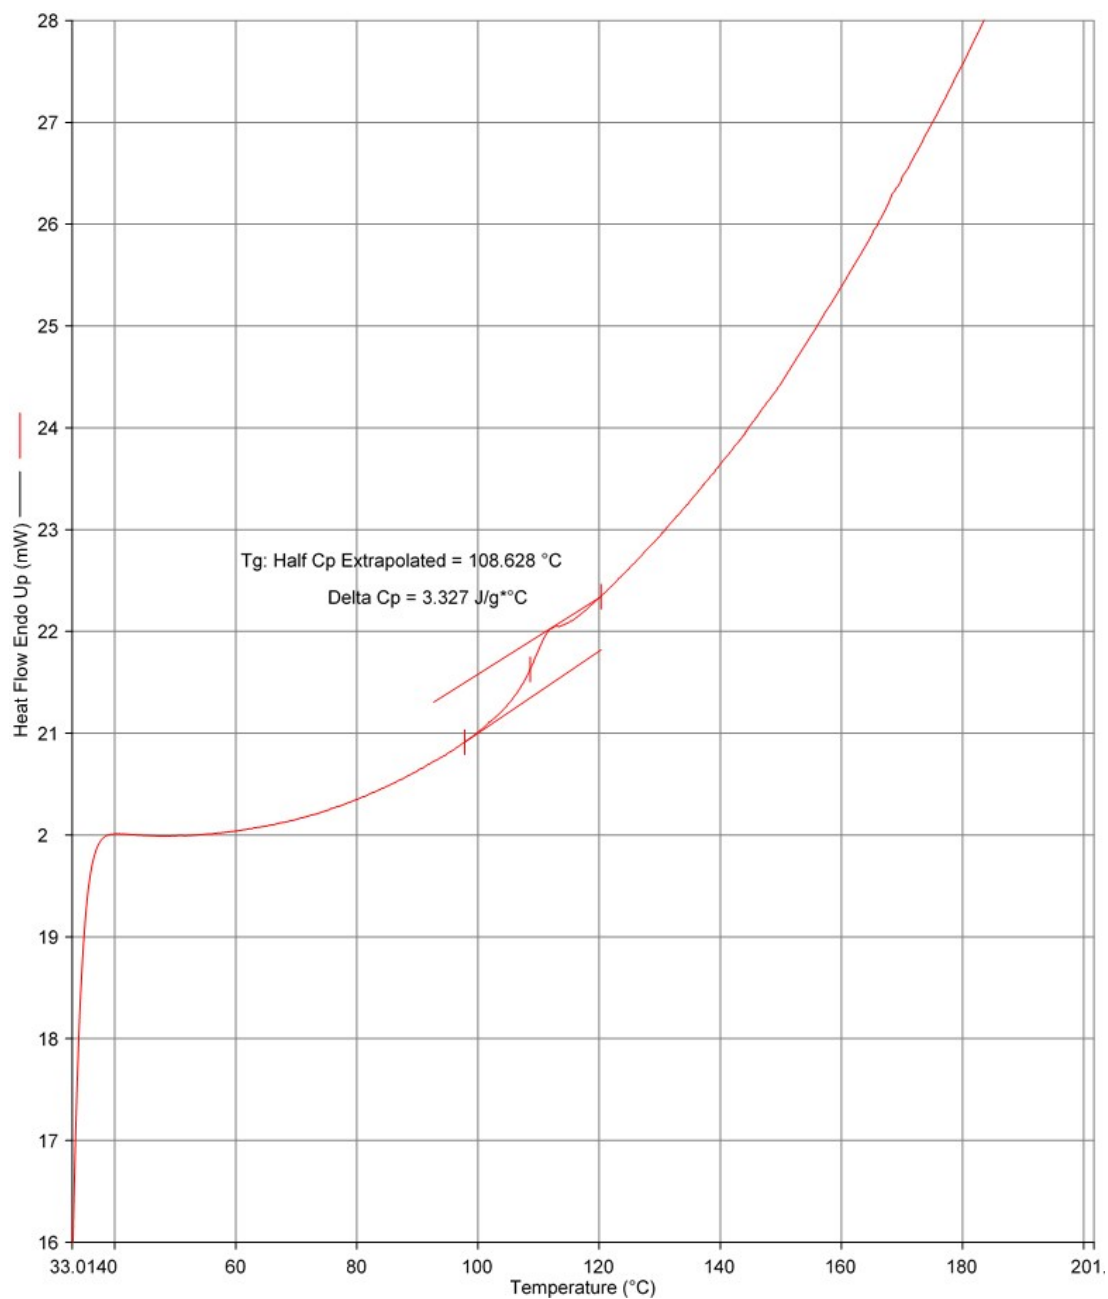

**Figure S3.** DSC spectrum of **PPFS** synthesized in glovebox.

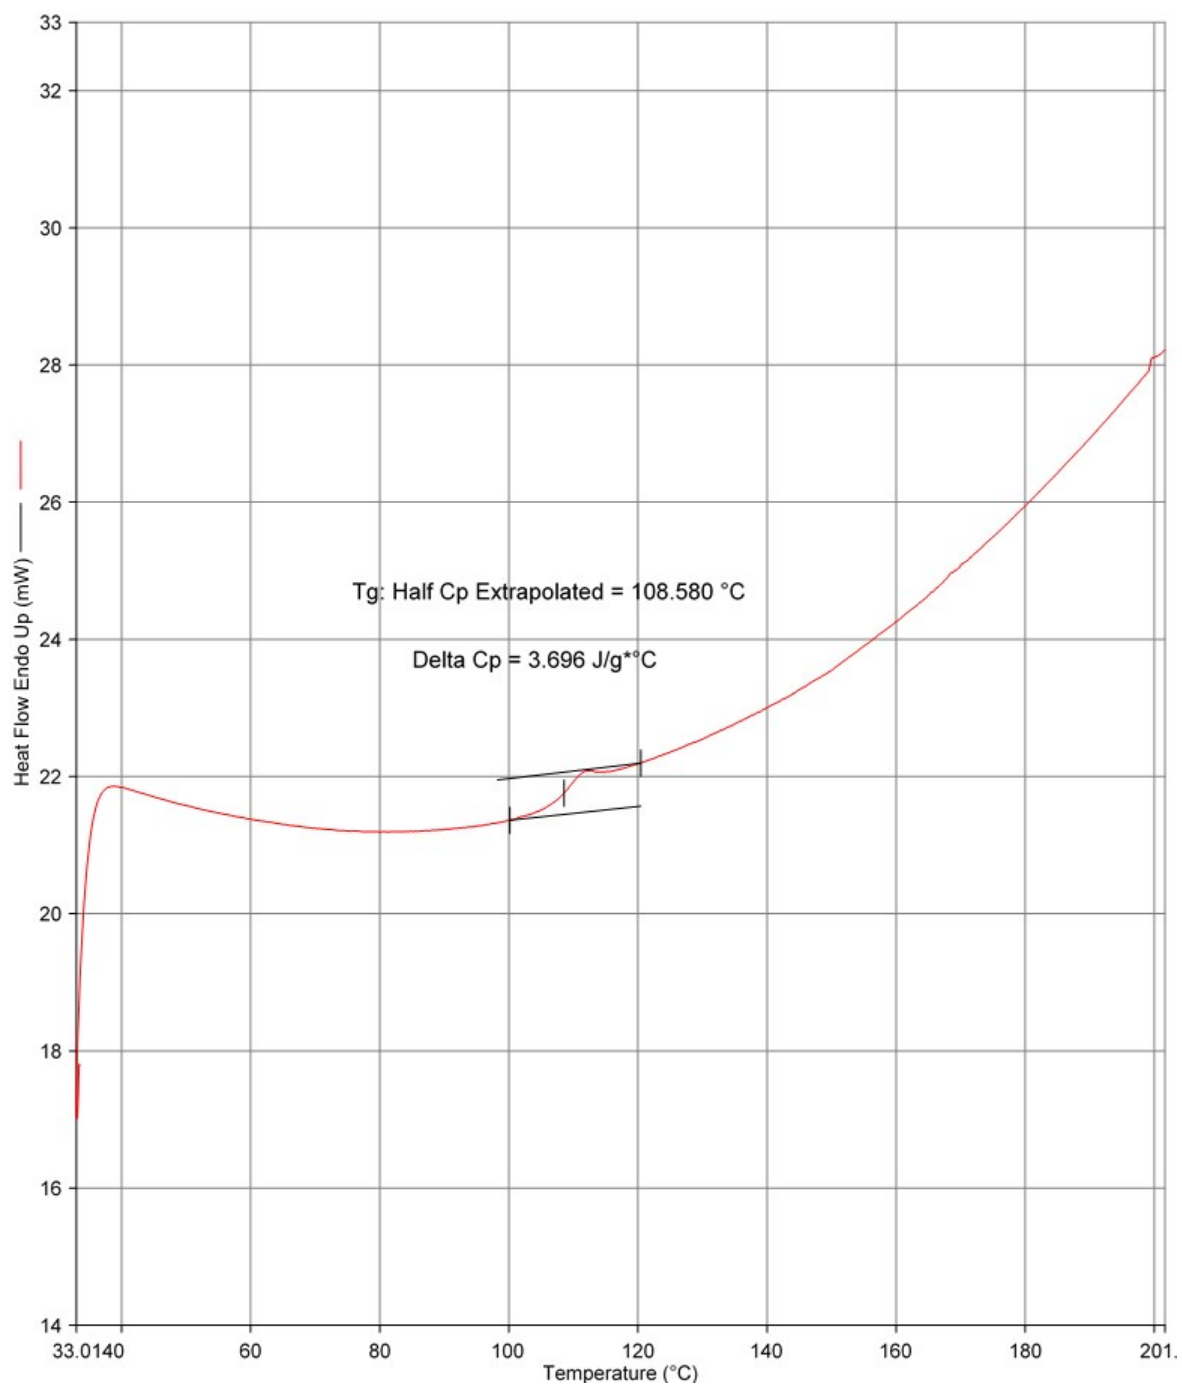

**Figure S4.** DSC spectrum of **PPFS** synthesized in ambient.

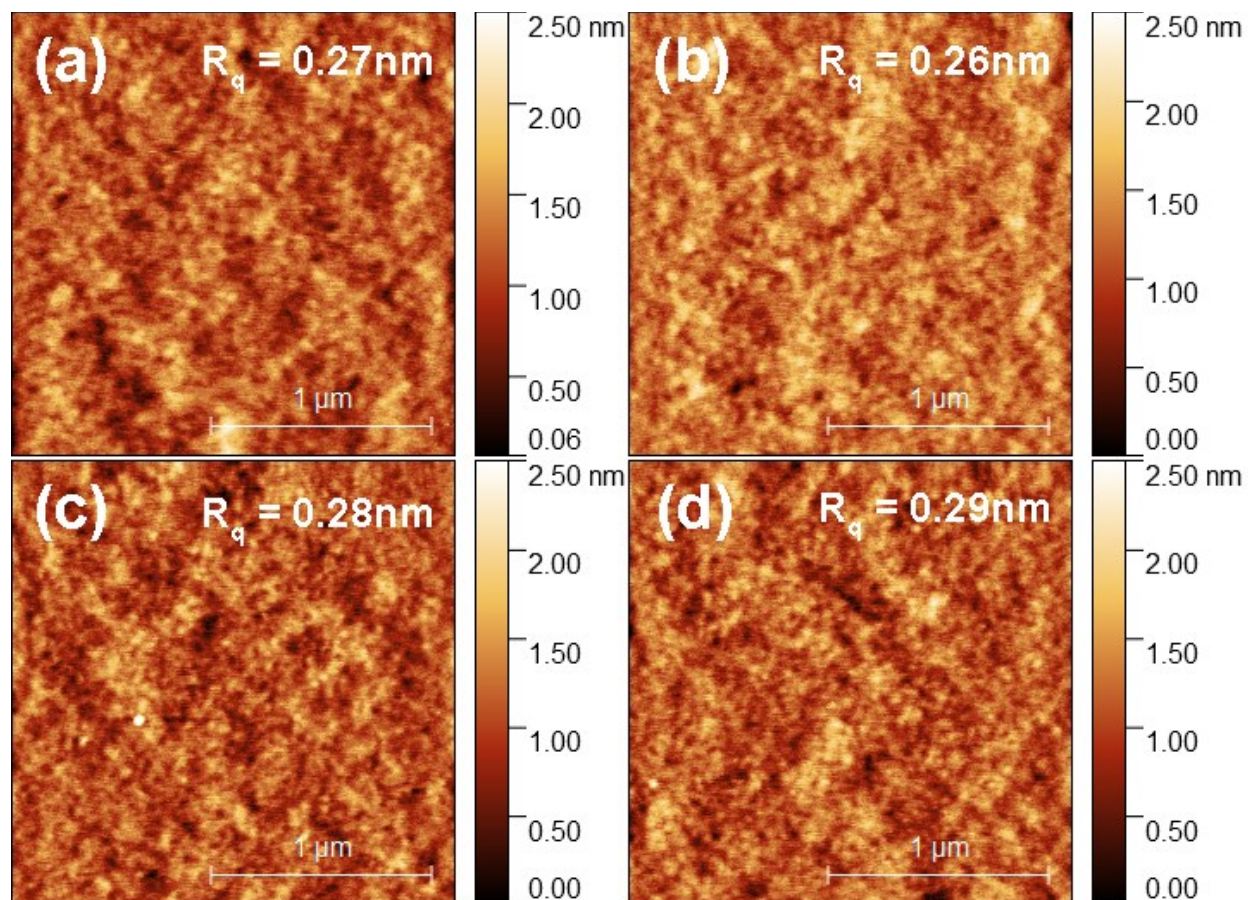

**Figure S5.** AFM images of **(a)** Pristine PPFS polymer thin film; **(b)** Chloroform; **(c)** Chlorobenzene and **(d)** Toluene treated PPFS polymer thin film.

Note: **PPFS** thin film on silicon dioxide substrate were submerged in three common organic solvents (chloroform, chlorobenzene and toluene) for 5 minutes. The samples were taken out and dried for AFM analysis to look into the morphology changes.

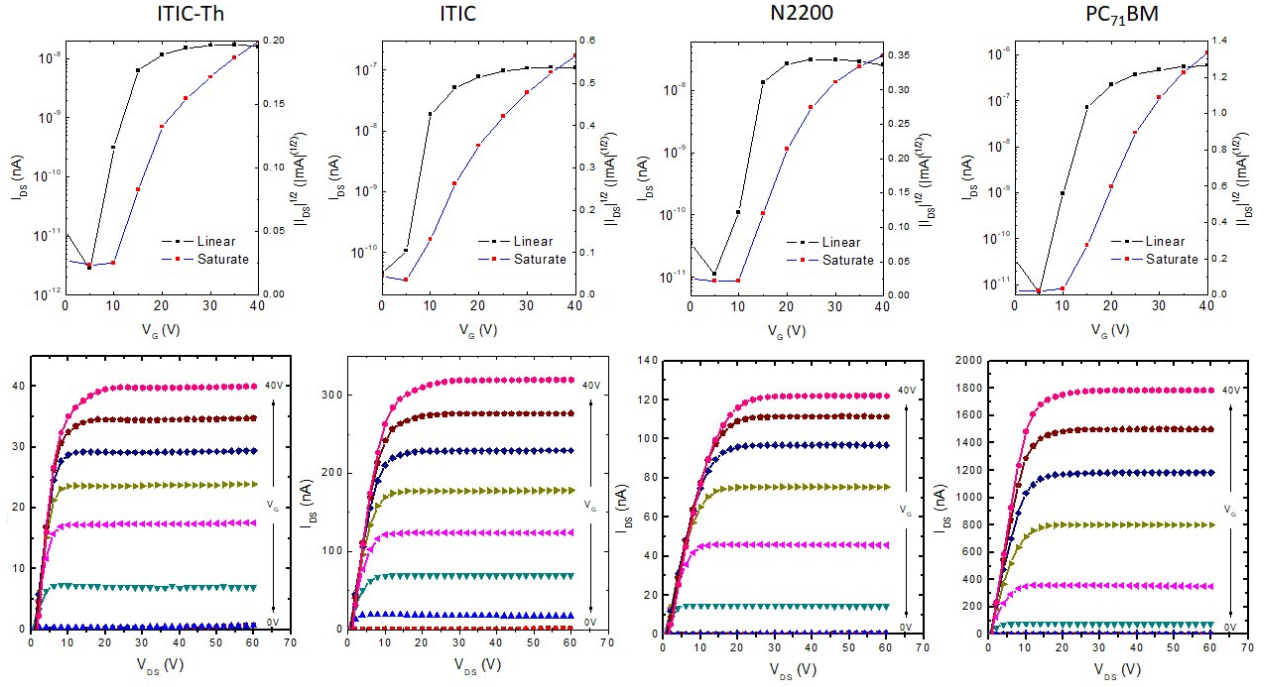

**Figure S6.** Transfer and output characteristics of **ITIC-Th**, **ITIC**, **N2200** and **PC<sub>71</sub>BM** without the use of **PDIN** as the electron injection layer

**Table S1.** Electronic properties of **ITIC-Th**, **ITIC**, **N2200** and **PC<sub>71</sub>BM** without the use of **PDIN** as the electron injection layer

| Sample                   | $\mu_{lin}$ (cm <sup>2</sup> V <sup>-1</sup> s <sup>-1</sup> ) | $\mu_{sat}$ (cm <sup>2</sup> V <sup>-1</sup> s <sup>-1</sup> ) | V <sub>T</sub> (V) | I <sub>on/off</sub> | N <sub>t</sub><br>(10 <sup>10</sup> cm <sup>-2</sup> ) |
|--------------------------|----------------------------------------------------------------|----------------------------------------------------------------|--------------------|---------------------|--------------------------------------------------------|
| <b>ITIC-Th</b>           | $1.1 \times 10^{-4}$                                           | $1.9 \times 10^{-4}$                                           | 7.5                | $6 \times 10^3$     | 15                                                     |
| <b>ITIC</b>              | $5.4 \times 10^{-4}$                                           | $7.8 \times 10^{-4}$                                           | 3.5                | $2.5 \times 10^3$   | 9                                                      |
| <b>N2200</b>             | $2.7 \times 10^{-4}$                                           | $6.1 \times 10^{-4}$                                           | 8.8                | $2.8 \times 10^3$   | 16.6                                                   |
| <b>PC<sub>71</sub>BM</b> | $2.8 \times 10^{-3}$                                           | $5.6 \times 10^{-3}$                                           | 9.8                | $8.9 \times 10^4$   | 10.5                                                   |

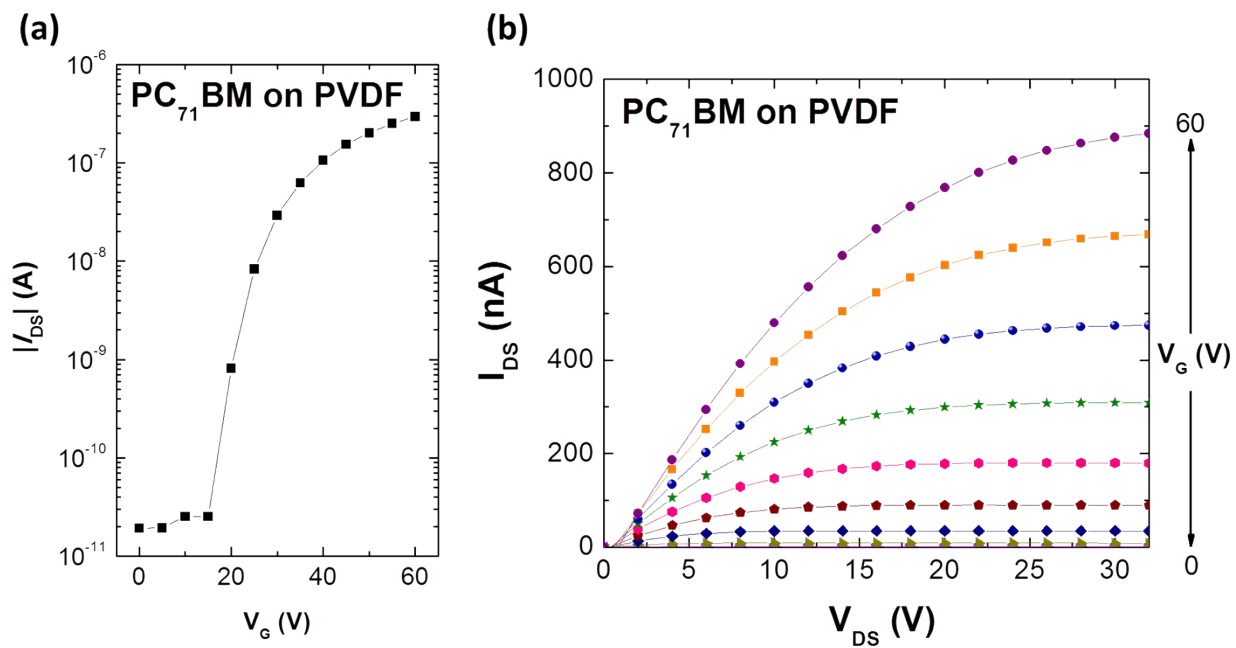

**Figure S7. (a) Transfer and (b) output characteristic of PC<sub>71</sub>BM n-type transistor employing PVDF as gate dielectric.**

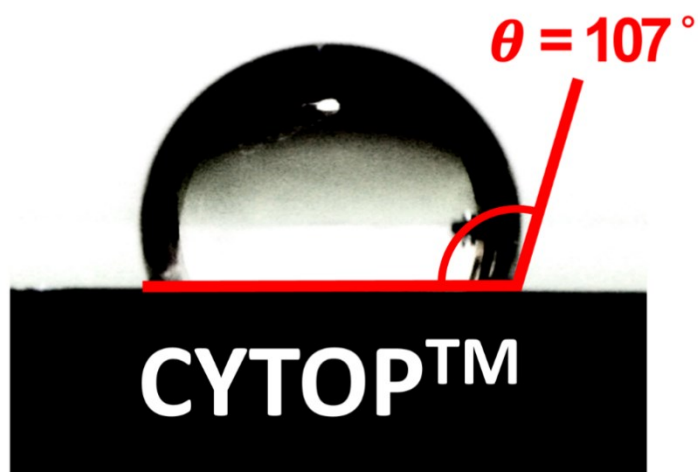

**Figure S8.** Water contact angle of CYTOP™-treated SiO<sub>2</sub> surface.
